# Supplementary material
Source: PubMed Central journal article supplement (PMC3343470)
Supplement: emboj201272s1.pdf [file emboj201272s1.pdf]

Supplementary Figure 1, Meijer et al.

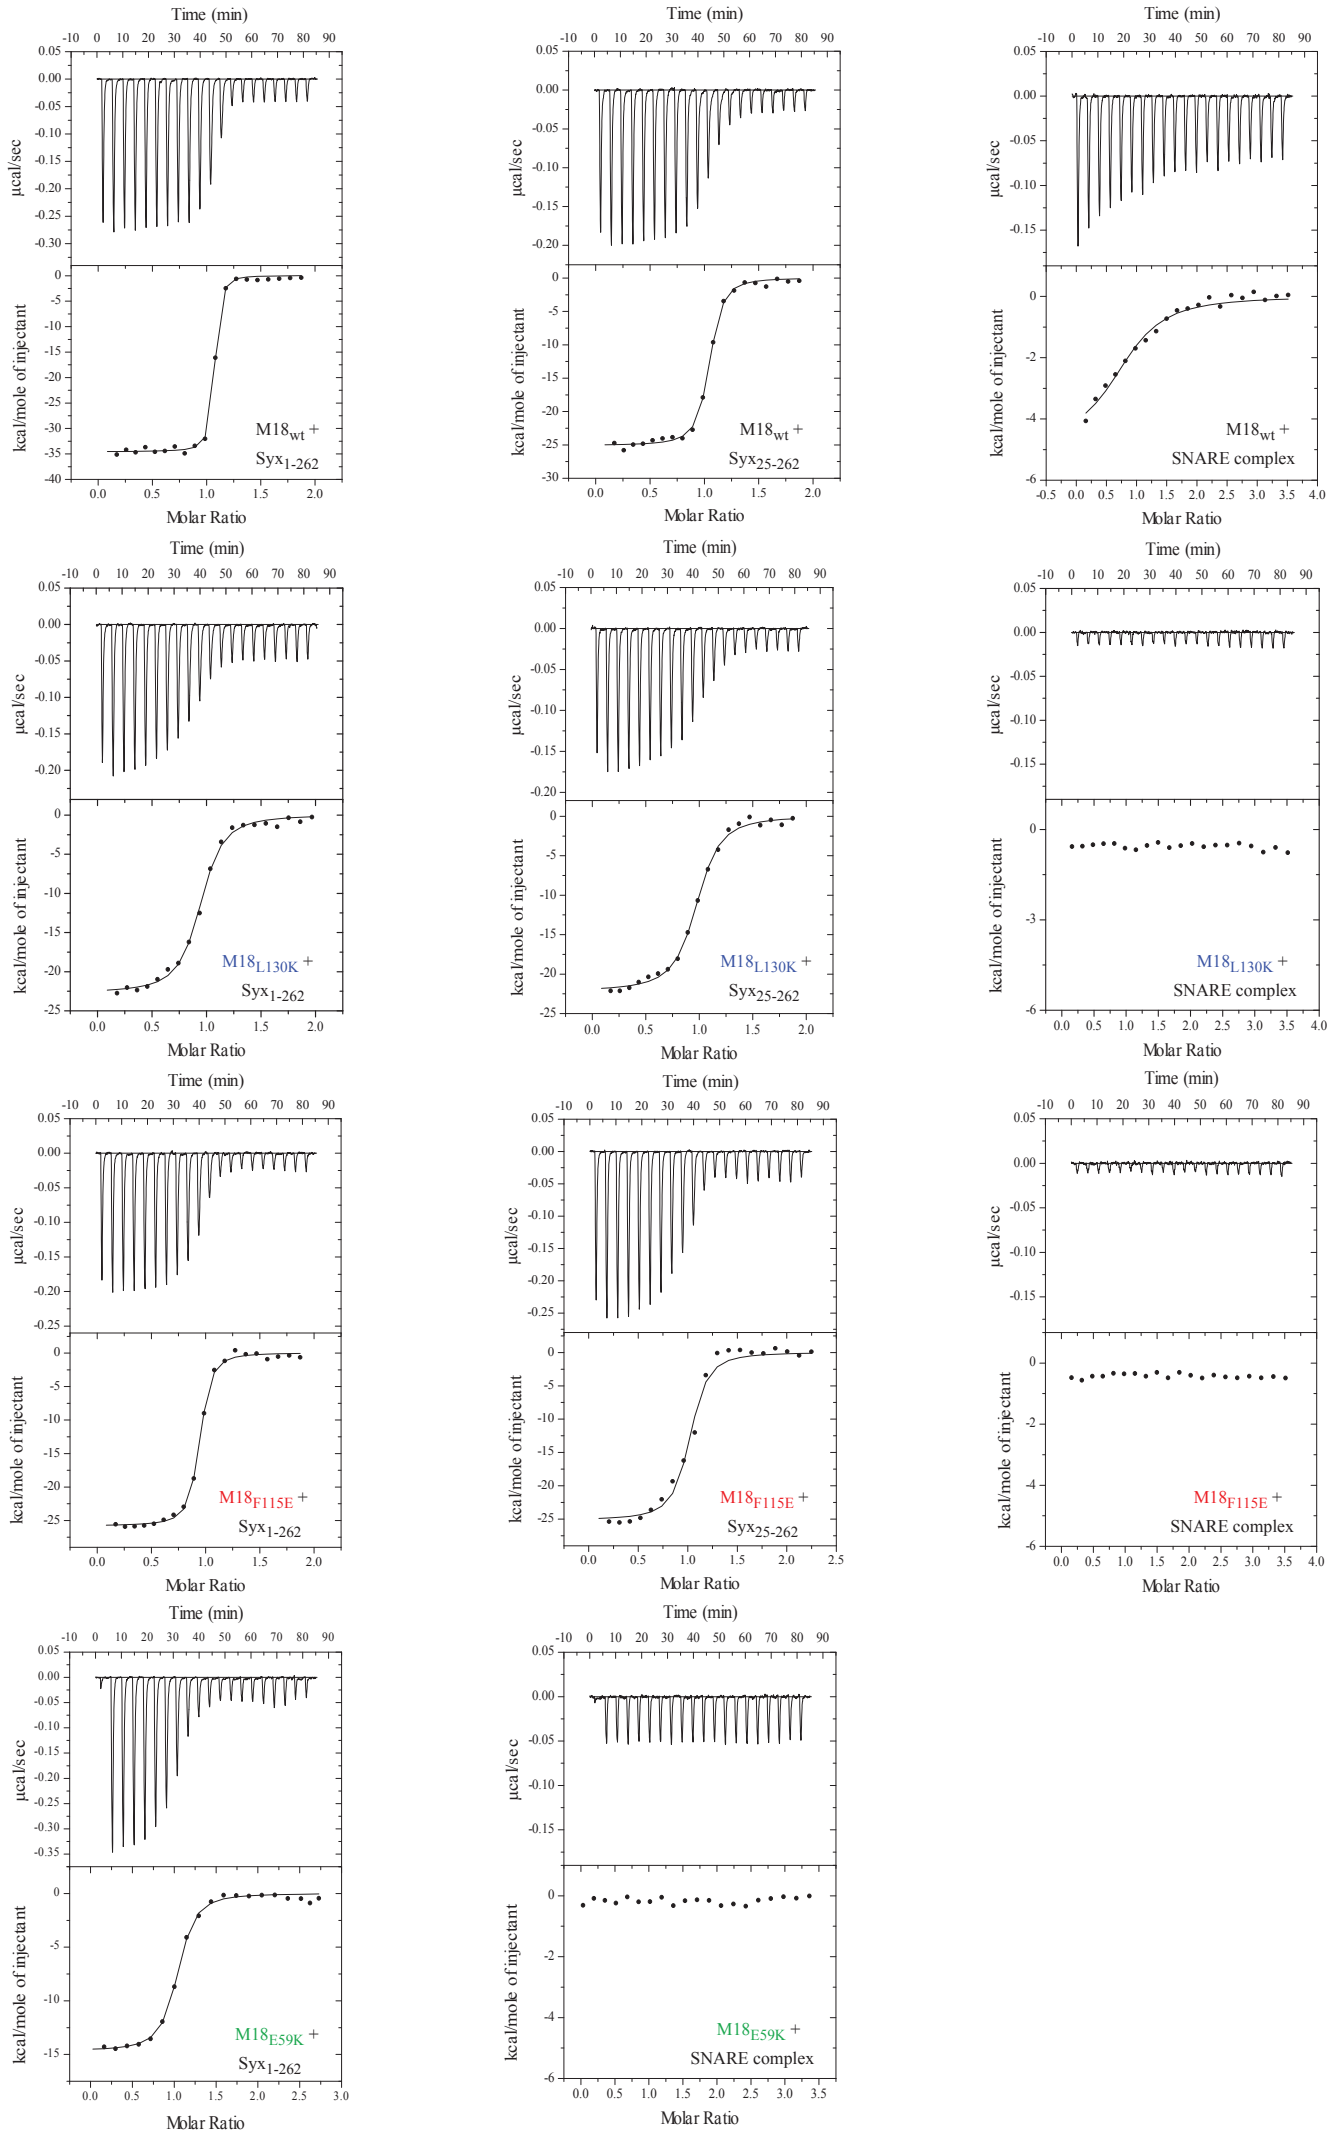

### Figure S1. Isothermal titration calorimetry data for binding of Syntaxin1a to Munc18-1

All isothermal calorimetric experiments were performed at 25°C in PBS buffer, pH 7.4. In each titration, the Syntaxin1a variant or Syntaxin1a assembled into a purified ternary SNARE complex (as indicated) was injected into Munc18-1. In each figure, the top panel shows the base-line corrected raw data in power versus time during the injections. The lower panel displays the integrated areas normalized to the amount of injectant (kcal mol<sup>-1</sup>) versus its molar ratio to Munc18-1. The solid lines represent the best fit to the data for a single binding site model using a nonlinear least squares fit. The results of the fits are given in Table 1. For experiments performed in replicate, a representative example is shown. The exact protein concentrations for the single ITC runs are: M18<sub>WT</sub> (2.5μM) + Syx<sub>1-262</sub> (20μM), M18<sub>WT</sub> (2.5μM) + Syx<sub>25-262</sub> (20μM), M18<sub>WT</sub> (4.0μM) + SNARE complex (60μM); M18<sub>L130K</sub> (2.5μM) + Syx<sub>1-262</sub> (20μM), M18<sub>L130K</sub> (2.5μM) + Syx<sub>25-262</sub> (20μM), M18<sub>L130K</sub> (4.0μM) + SNARE complex (60μM); M18<sub>F115E</sub> (2.5μM) + Syx<sub>1-262</sub> (20μM), M18<sub>F115E</sub> (2.5μM) + Syx<sub>25-262</sub> (20μM), M18<sub>F115E</sub> (4.0μM) + SNARE complex (60μM); M18<sub>E59K</sub> (4.0μM) + Syx<sub>1-262</sub> (57μM), M18<sub>E59K</sub> (4.0μM) + SNARE complex (60μM).

A

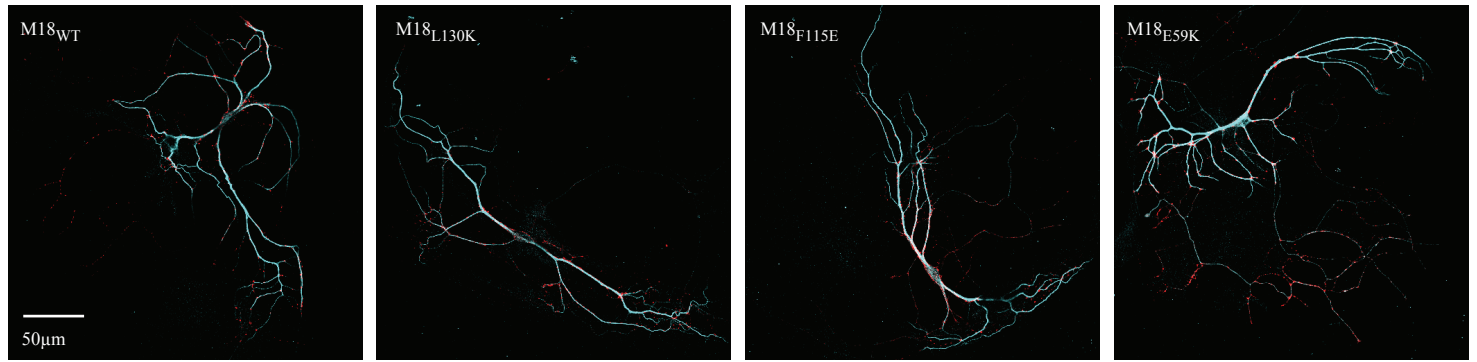

■ M18<sup>WT</sup>   ■ M18<sup>L130K</sup>   ■ M18<sup>F115E</sup>   ■ M18<sup>E59K</sup>

B

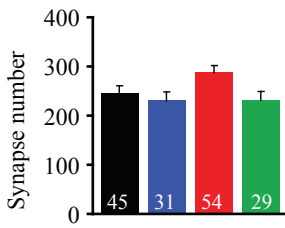

C

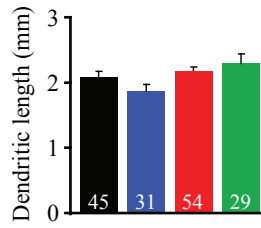

D

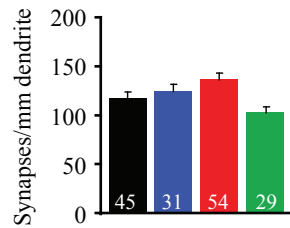

E

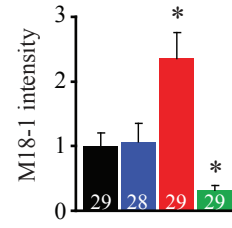

F

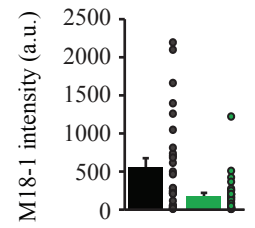

### Figure S2. Neuronal morphology and synaptic protein levels.

(A) Representative images from *Munc18-1* null autaptic neurons rescued with M18<sup>WT</sup>, M18<sup>L130K</sup>, M18<sup>F115E</sup> or M18<sup>E59K</sup> and stained for MAP2 (blue) and VAMP (red). (B-D) The amount of synapses per neuron, dendritic length and synapse density were similar among groups. (E) Quantification of presynaptic protein levels from immuno-fluorescent confocal images in rescued *Munc18-1* null neurons (Kruskal-Wallis test with Dunn's post test,  $P < 0.05$  for M18<sup>F115E</sup> and M18<sup>E59K</sup>). (F) Individual synaptic Munc18-1 levels per neuron, together with the mean value, are shown for M18<sup>WT</sup> and M18<sup>E59K</sup>.

Data are mean ± SEM (significant differences from wt are depicted as \* $p < 0.05$ , \*\* $p < 0.01$ , \*\*\* $p < 0.001$ ).

Supplementary Figure 3, Meijer et al.

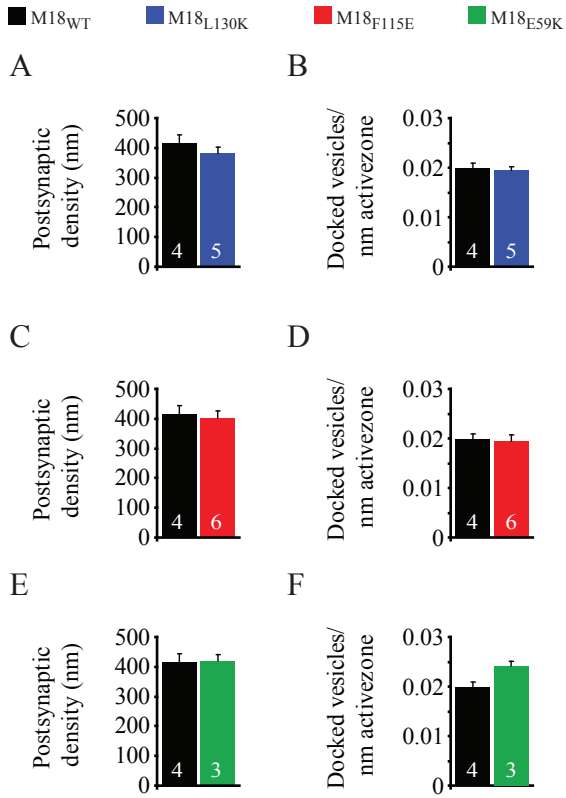

**Figure S3. Ultrastructural features of the synapse by electron microscopy are normal**

(A) The size of the postsynaptic density is normal in neurons rescued with M18<sub>L130K</sub>. (B) Number of docked vesicles per nm active zone is normal in neurons rescued with M18<sub>L130K</sub>. (C) The size of the postsynaptic density is normal in neurons rescued with M18<sub>F115E</sub>. (D) Number of docked vesicles per nm active zone is normal in neurons rescued with M18<sub>F115E</sub>. (E) The size of the postsynaptic density is normal in neurons rescued with M18<sub>E59K</sub>. (F) Number of docked vesicles per nm active zone in neurons rescued with M18<sub>E59K</sub> is comparable to M18<sub>WT</sub>.

N = 3-6 islands, n = 85-102 synapses. Data are mean  $\pm$  SEM (significant differences from wt are depicted as \*p < 0.05, \*\*p < 0.01, \*\*\*p < 0.001).

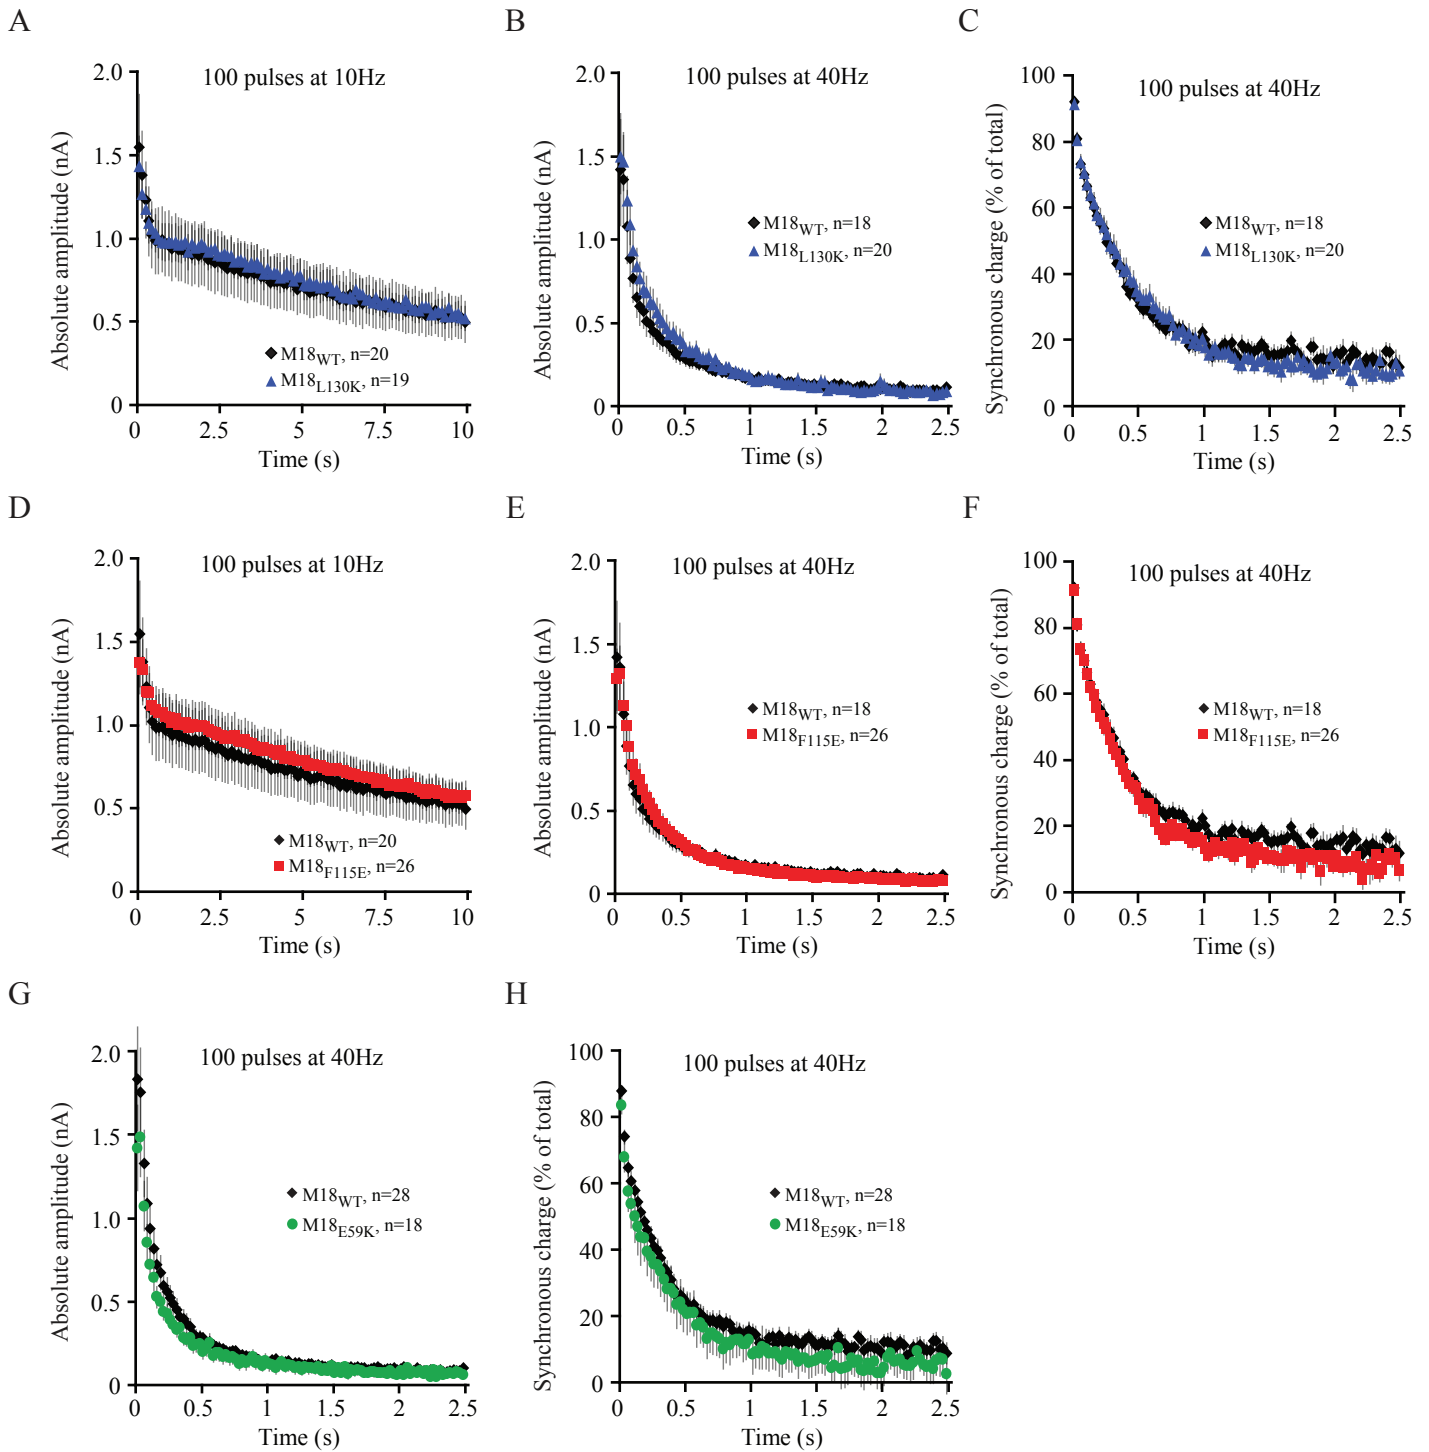

**Figure S4. Rundown of EPSC sizes and synchronicity of release is unaltered during trains of stimulation.** (A) EPSC sizes for M18<sub>WT</sub> and M18<sub>L130K</sub> during a train of 100 pulses at 10Hz. (B) EPSC sizes for M18<sub>WT</sub> and M18<sub>L130K</sub> during a train of 100 pulses at 40Hz. (C) Percentage of synchronous EPSC charge for M18<sub>WT</sub> and M18<sub>L130K</sub> in response to 100 pulses at 40Hz. (D) EPSC sizes for M18<sub>WT</sub> and M18<sub>F115E</sub> during a train of 100 pulses at 10Hz. (E) EPSC sizes for M18<sub>WT</sub> and M18<sub>F115E</sub> during a train of 100 pulses at 40Hz. (F) Percentage of synchronous EPSC charge for M18<sub>WT</sub> and M18<sub>F115E</sub> in response to 100 pulses at 40Hz. (G) EPSC sizes for M18<sub>WT</sub> and M18<sub>E59K</sub> during a train of 100 pulses at 40Hz. (H) Percentage of synchronous EPSC charge for M18<sub>WT</sub> and M18<sub>E59K</sub> in response to 100 pulses at 40Hz.

Data are mean  $\pm$  SEM.

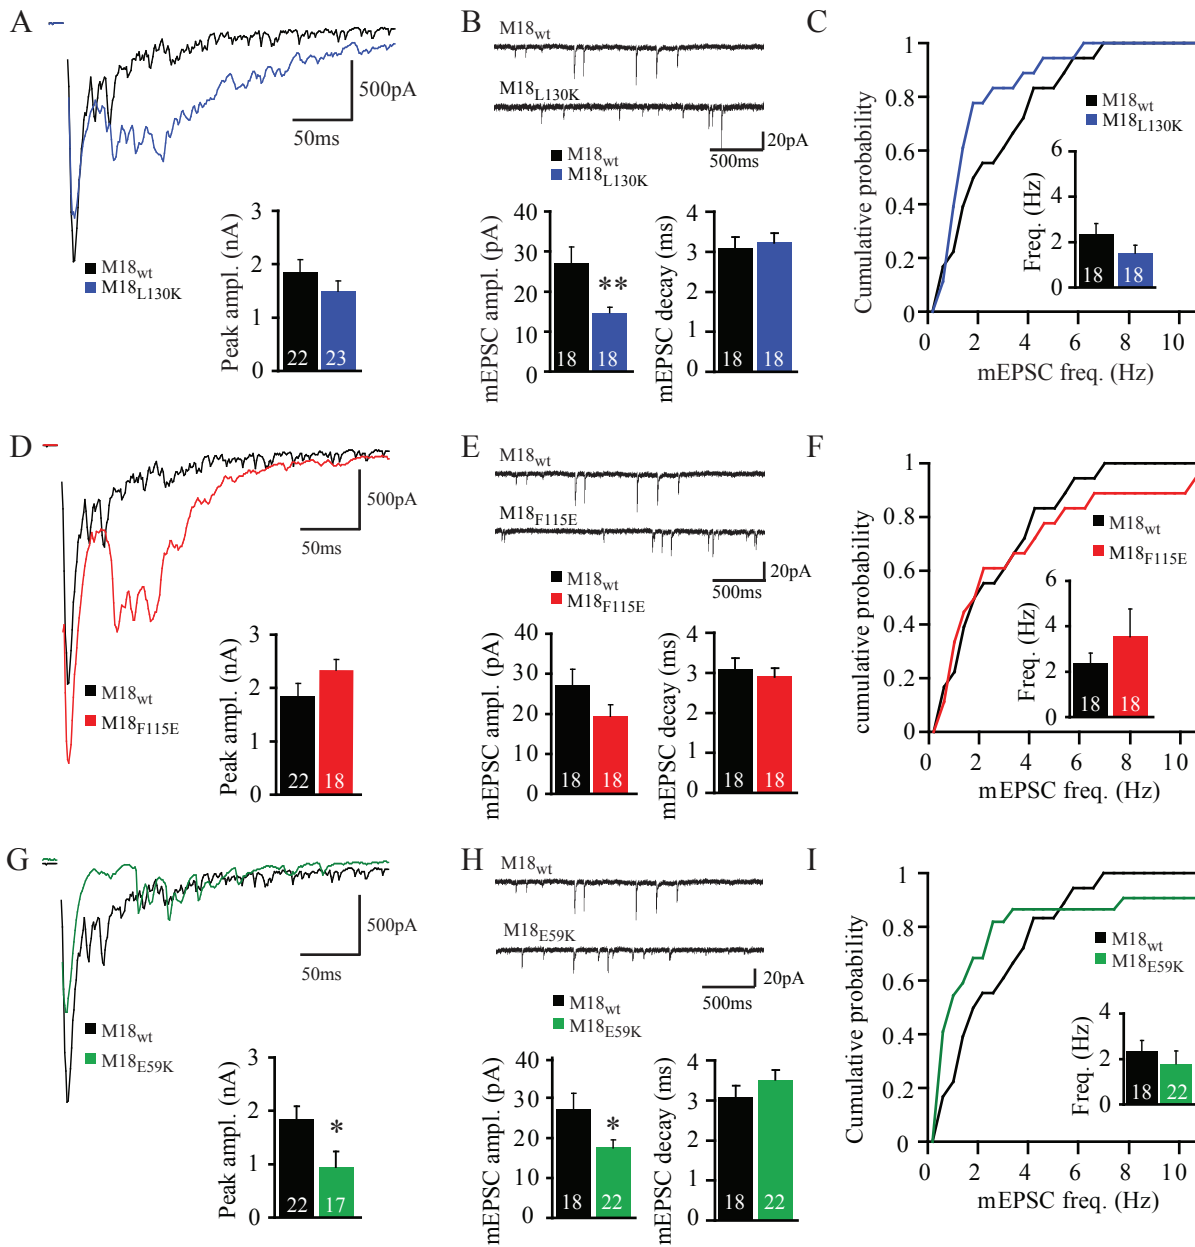

**Figure S5. All mutants support synaptic transmission in network cultures**

(A) Representative traces of field stimulation induced EPSCs in cortical cultures. Neurons rescued with M18<sub>L130K</sub> have a similar peak amplitude in response to field stimulation as neurons rescued with M18<sub>WT</sub>. (B) Example traces of spontaneous release recorded in the presence of 1 $\mu$ M TTX. The amplitude of spontaneous release events is smaller in cultures rescued with M18<sub>L130K</sub> (Kruskal-Wallis with Dunn's post test,  $P < 0.01$ ). The decay of the events is unchanged. (C) Cumulative frequency plot of spontaneous release events. Insert shows average frequency. (D) Representative traces of field stimulation induced EPSCs in cortical cultures. Neurons rescued with M18<sub>F115E</sub> have a similar peak amplitude in response to field stimulation as neurons rescued with M18<sub>WT</sub>. (E) Example traces of spontaneous release recorded in the presence of 1 $\mu$ M TTX. The amplitude of spontaneous release events is unaffected. The decay of the events is unchanged. (F) Cumulative frequency plot of spontaneous release events. Insert shows average frequency. (G) Representative traces of field stimulation induced EPSCs in cortical cultures. Neurons rescued with M18<sub>E59K</sub> produce smaller peak amplitudes in response to field stimulation than neurons rescued with M18<sub>WT</sub> (ANOVA with Bonferroni post test,  $P < 0.05$ ). (H) Example traces of spontaneous release recorded in the presence of 1 $\mu$ M TTX. The amplitude of spontaneous release events is smaller in neurons rescued with M18<sub>E59K</sub> (Kruskal-Wallis with Dunn's post test,  $P < 0.05$ ). The decay of the events is unchanged. (I) Cumulative frequency plot of spontaneous release events. Insert shows average frequency.

Data are mean  $\pm$  SEM (Significant differences from wt are depicted as \* $p < 0.05$ , \*\* $p < 0.01$ , \*\*\* $p < 0.001$ ).
